# Supplementary material for: The SARS-CoV-2 spike protein binds and modulates estrogen receptors
Source: PubMed Central journal article supplement — Sci Adv. 2022 Nov 30;8(48):eadd4150. doi: 10.1126/sciadv.add4150 (PMC9710872; doi:10.1126/sciadv.add4150), 2022-11-30
Supplement: sciadv.add4150_sm.pdf [file sciadv.add4150_sm.pdf]

Supplementary Materials for  
**The SARS-CoV-2 spike protein binds and modulates estrogen receptors**

Oscar Solis *et al.*

Corresponding author: Michael Michaelides, [mike.michaelides@nih.gov](mailto:mike.michaelides@nih.gov);  
Marcello Allegretti, [marcello.allegretti@dompe.com](mailto:marcello.allegretti@dompe.com)

*Sci. Adv.* **8**, eadd4150 (2022)  
DOI: 10.1126/sciadv.add4150

**This PDF file includes:**

Figs. S1 to S10  
Tables S1 to S3

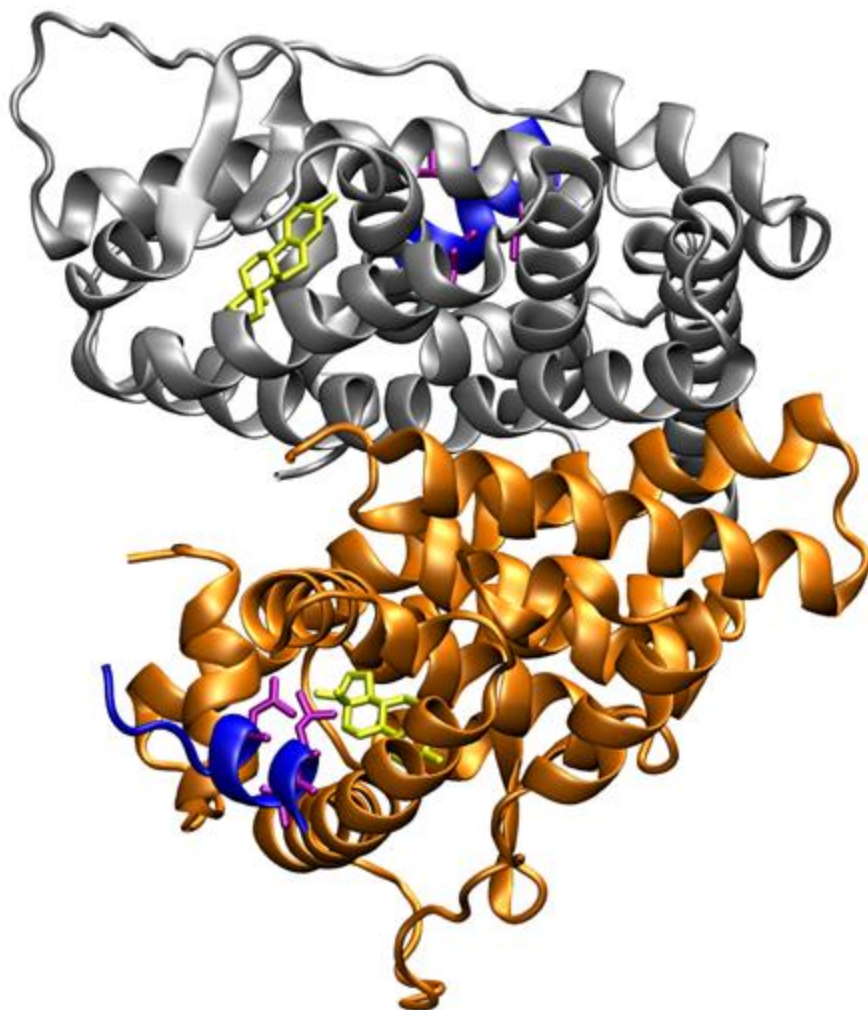

**Fig. S1.**

Crystal structure of ER $\alpha$  dimer in interaction with a NCOA1 fragment containing the LXD nuclear receptor coregulator (NRC) motif (pdb id 3UUD). The AF2 region in ER $\alpha$  (residues 302-552) is shown in silver and orange colors for the two monomers. The NCOA1 fragment containing the LHKLL (residues 690-694) is represented in blue color. Lateral chains of the three leucine residues are also represented in purple color. Estradiol is shown in yellow color.

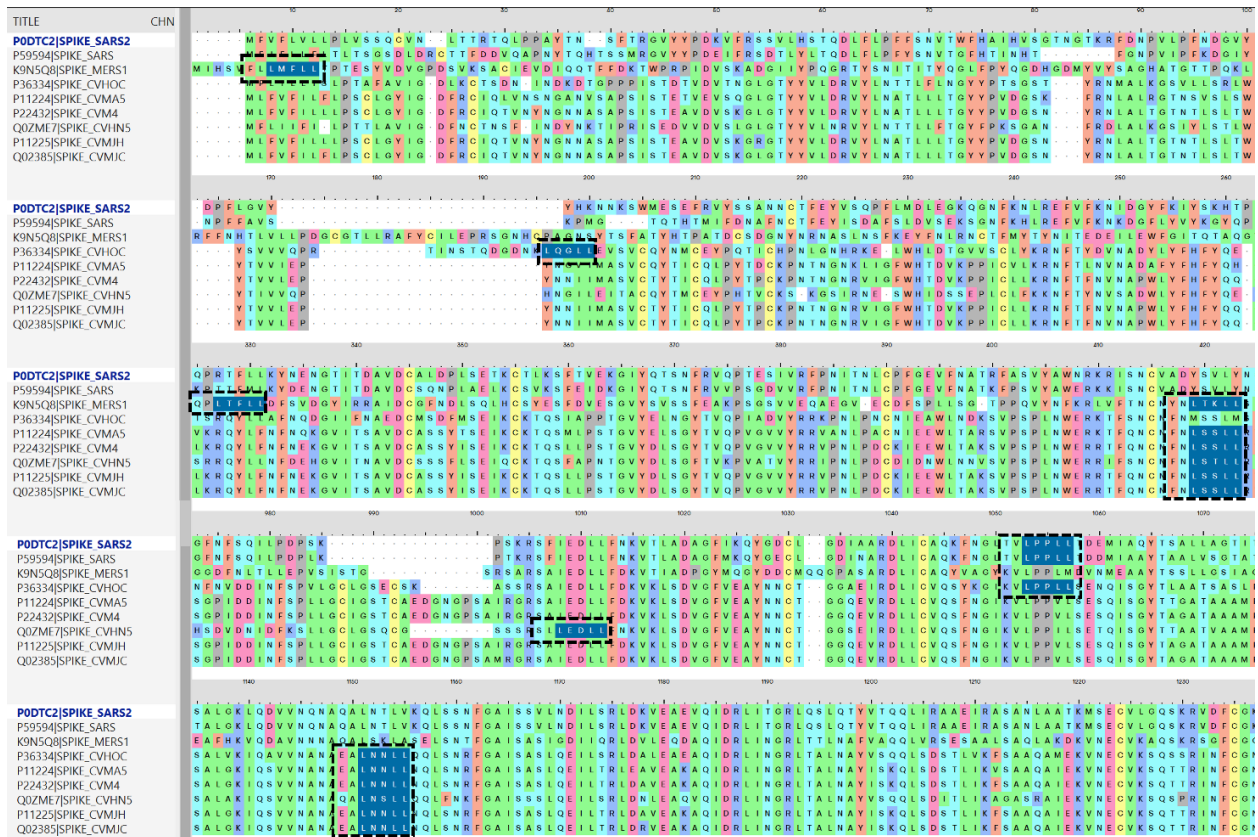

**Fig. S2.**

S protein sequence alignment and LDX motif identification. Amino acid patterns related to the LDX-like motif, conserved among different species, are highlighted in blue, and surrounded by black dotted boxes.

Top 10 docking score

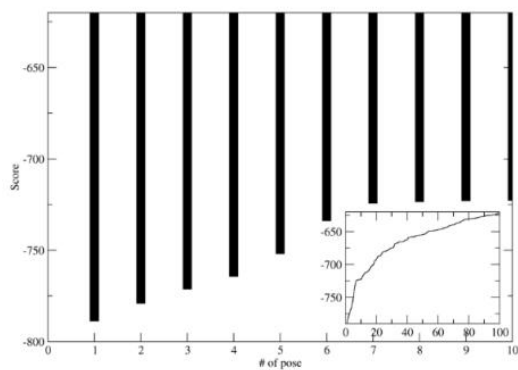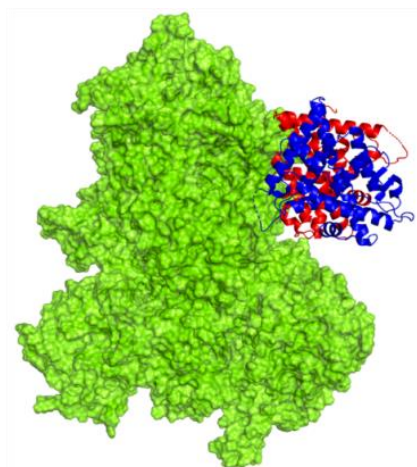

**Fig. S3.**

Binding hypothesis of ER to S by guided docking study. On the left side the plot reporting the top 10 docking scores and the score distribution along the 100 structures generated by the docking software (the smaller plot below). On the right side, the best 3D docking hypothesis. The ER dimer is in blue and red cartoon, S surface is shown in green.

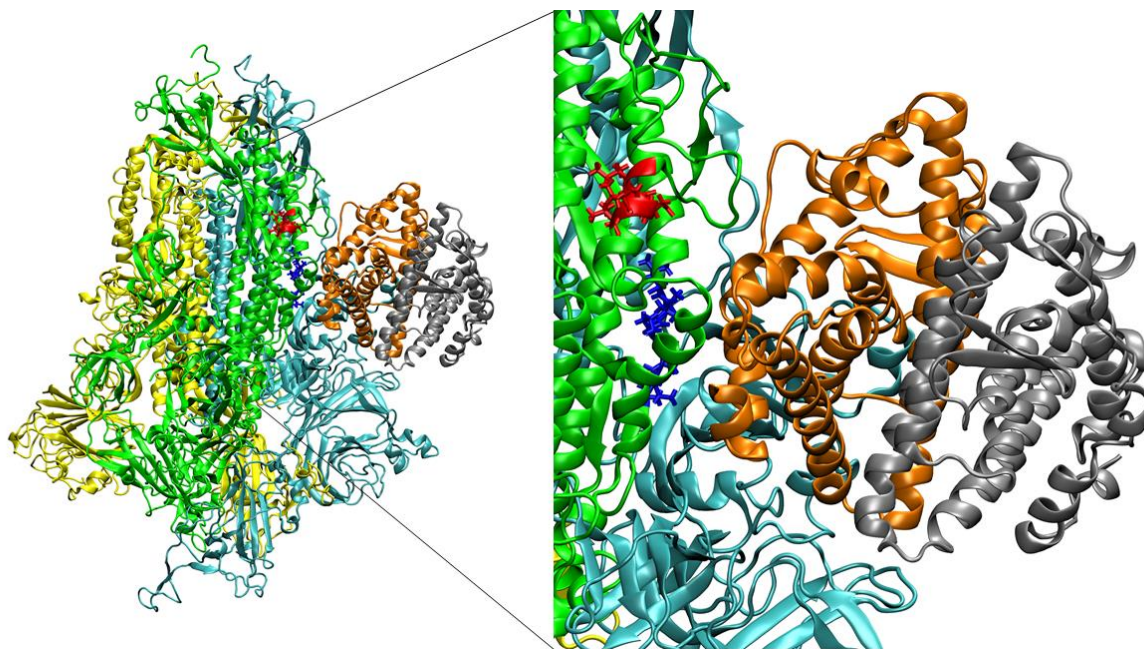

**Fig. S4.**

Snapshot of molecular dynamics frame for the S-ER $\alpha$  complex. The simulation shows the formation of a strong interaction surface between ER and S, in the region of the two conserved LXD motifs. The average number of protein-protein direct hydrogen bonds per timeframe is more than 14 after only few hundred nanoseconds.

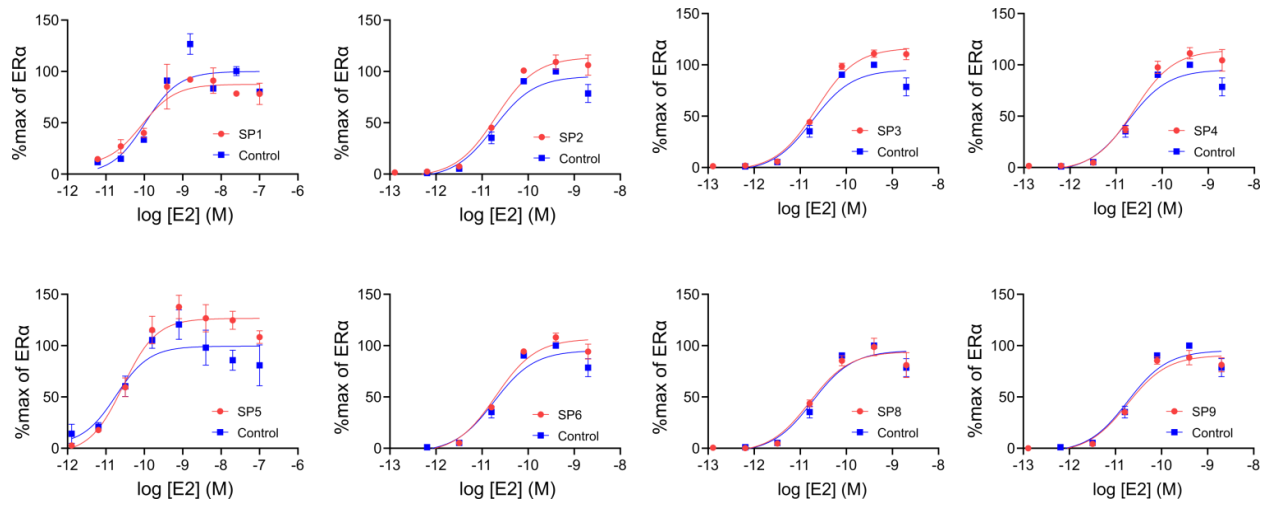

**Fig. S5.**

Effect of S peptides on ER $\alpha$ -mediated transcriptional activation. Data are shown as mean  $\pm$  SEM.

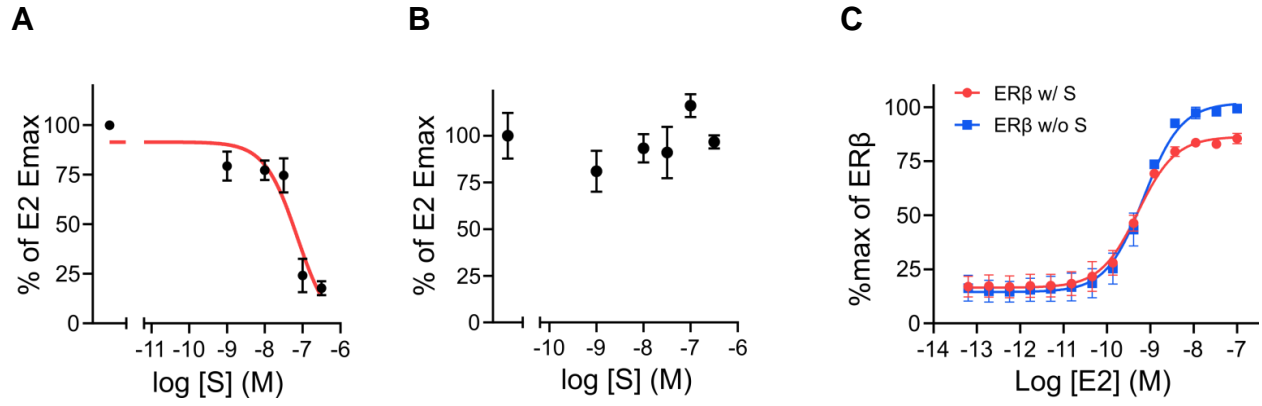

**Fig. S6.**

S trimer (A), but not S-RBD (B), inhibits E2-induced ER $\alpha$  DNA binding in MCF-7 nuclear extracts. Transfected S inhibits E2-stimulated ER $\beta$  transcriptional activity (C). Data are shown as mean  $\pm$  SEM.

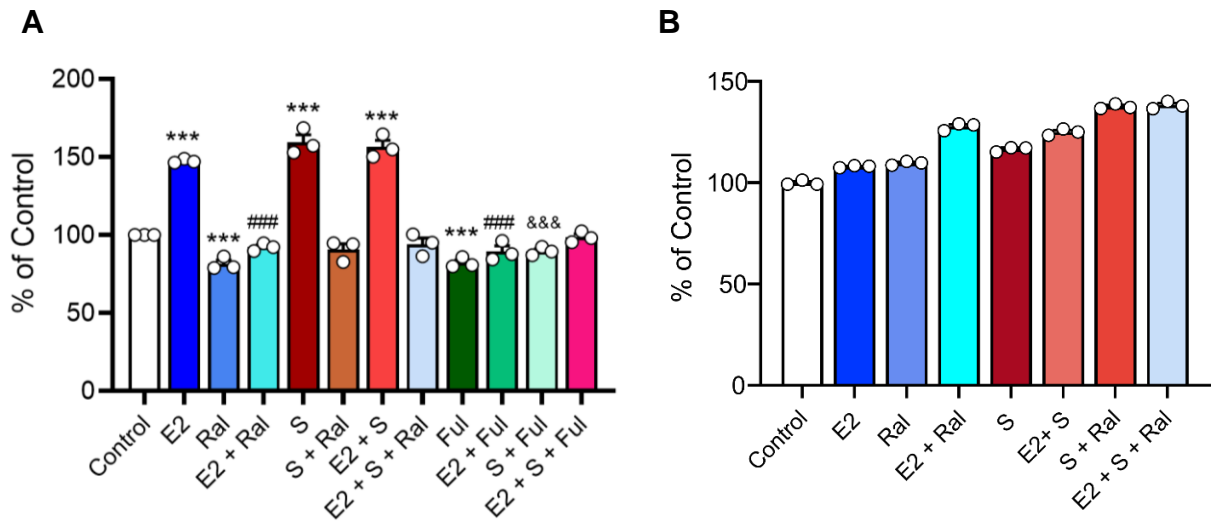

**Fig. S7.**

(A) Fulvestrant (ICI 182,780) (1  $\mu$ M) and raloxifene (2  $\mu$ M) blocked MCF-7 proliferation induced by S (10 ng/mL or E2 (1 nM), (\*\* $P$ <0.01, \*\*\* $P$ <0.001 versus control; ### $P$ <0.001 versus E2; &&& $P$ <0.001 versus S; one-way ANOVA with post hoc Tukey test). Results are mean  $\pm$  SD of 3 independent experiments. (B) BrdU Proliferation assay for MDA-MB-231 cell line. All the treatments alone or in combination do not significantly affect cell proliferation. The assay was performed in triplicate. Results are shown as mean  $\pm$  SD of one representative experiment.



**A**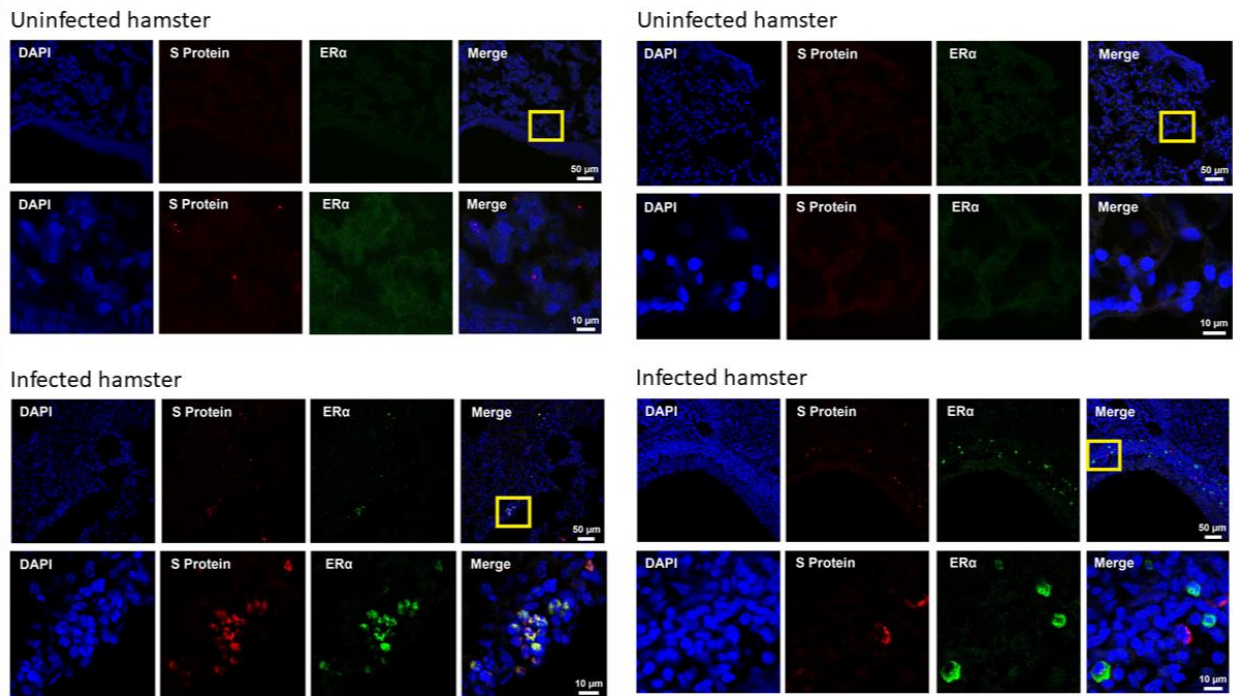**B**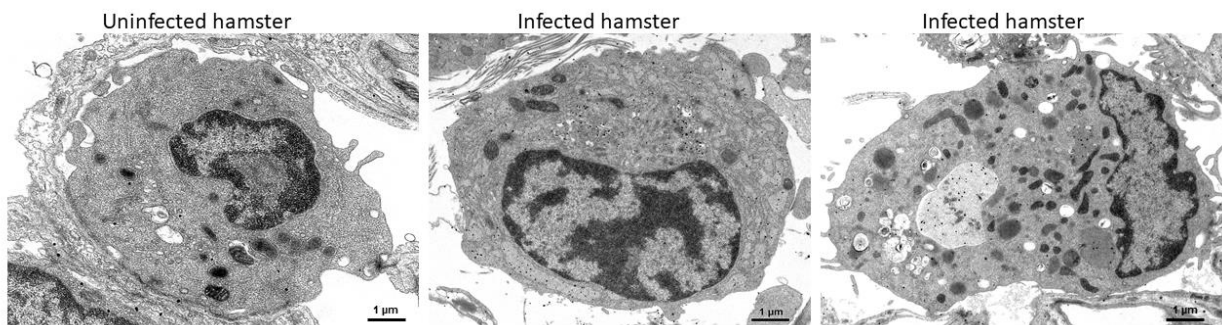**C**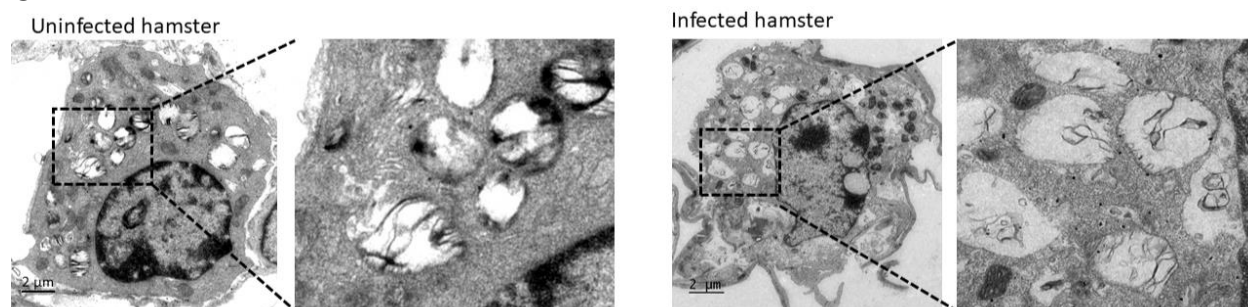**Fig. S8.**

SARS-CoV-2 infection induces cytoplasmic expression of ER $\alpha$  protein in hamsters. Immunohistochemistry showing colocalization of S and ER $\alpha$  immunoreactivity in infected lung hamster (A). Immunogold EM showing ER $\alpha$ -bound gold nanoparticles in hamster alveolar macrophages (B) and pulmonary type II cells (C).

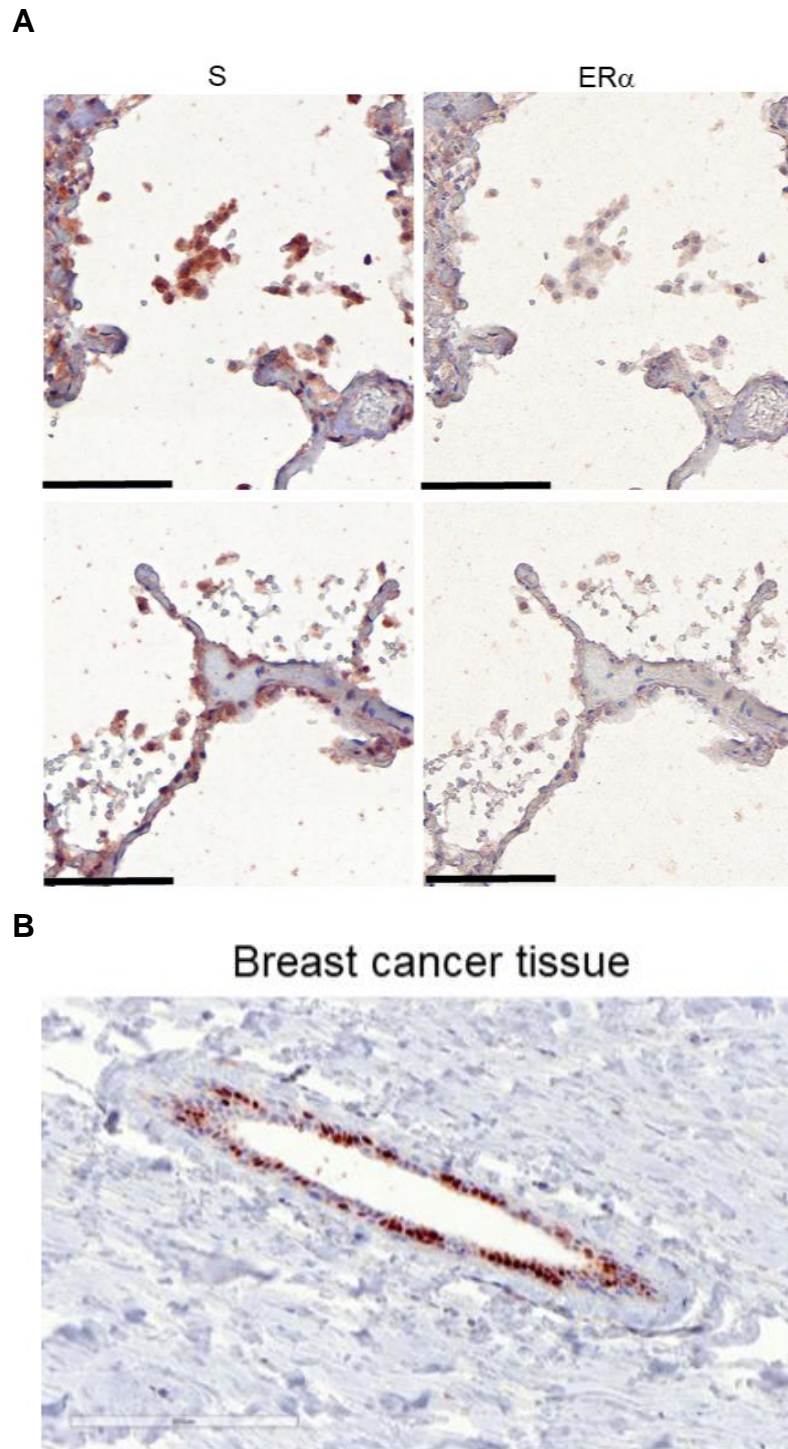

**Fig. S9.**

S and ER $\alpha$  immunostaining in SARS-CoV-2-infected human lung showing S-ER $\alpha$  colocalization. Scale bar 100 nm (A). Immunohistochemistry showing ER $\alpha$  immunoreactivity in breast cancer tissue. Scale bar 200 nm (B).

**A**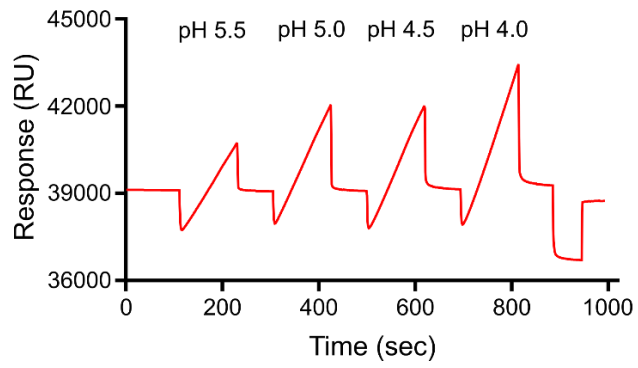**B**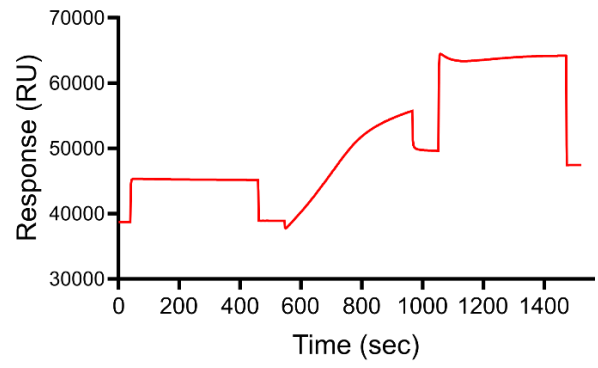**Fig. S10.**

(A) The sensorgram shows the effect of buffer pH on immobilization of S to the chip surface. (B) Sensorgram illustrating the immobilized amount of S at pH 4.

**Table S1**

| Database ID    | Mean signal used | Mean Z-Factor | Mean Z-Score | Mean CI P-Value | Mean CV  | Description                                            |
|----------------|------------------|---------------|--------------|-----------------|----------|--------------------------------------------------------|
| NP_001019799.1 | 2553.66          | 0.44708       | 0.829635     | 0.043687        | 0.04742  | NRP1 / Neuropilin-1 Protein                            |
| BC020803.1     | 6186.558         | 0.57108       | 7.054942     | 0.002179        | 0.09359  | Developmentally regulated GTP binding protein 1 (DRG1) |
| BC033792.1     | 2805.59          | 0.671277      | 2.627567     | 0.013592        | 0.04339  | Tumor protein D52-like 3 (TPD52L3)                     |
| NM_016059.3    | 3130.755         | 0.641917      | 3.062002     | 0.010238        | 0.024877 | Peptidylprolyl isomerase (cyclophilin)-like 1 (PPIL1)  |
| NM_016508.2    | 5234.063         | 0.594467      | 5.65815      | 0.003209        | 0.081497 | Cyclin-dependent kinase-like 3                         |
| NM_022140.2    | 2422.185         | 0.554883      | 1.70084      | 0.043508        | 0.058637 | Band 4.1-like protein 4A                               |
| NM_145010.1    | 8754.735         | 0.656837      | 9.09587      | 0.001407        | 0.074957 | chromosome 10 open reading frame 63 (C10orf63)         |

The data was obtained from three independent Protoarrays

**Table S1.** Proteins identified by protein-protein interaction with [<sup>125</sup>I]S using the Protoarray platform.

**Table S2**

| <b>INTERACTION PROTEINS</b> | <b>SCORE</b> |
|-----------------------------|--------------|
| ER $\alpha$ > NCOA1         | 0.997        |
| ER $\alpha$ > NCOA2         | 0.995        |
| ER $\beta$ > NCOA1          | 0.994        |
| ER $\beta$ > NCOA2          | 0.971        |
| ER $\beta$ > NCOA3          | 0.976        |

**Table S2.** Scores showing strong interaction between ER $\alpha/\beta$  and NCOAs.

**Table S3.**

| Virus Species                                                                  | UNIPROT CODE |
|--------------------------------------------------------------------------------|--------------|
| Severe acute respiratory syndrome coronavirus 2 (2019-nCoV) (SARS-CoV-2)       | SPIKE_SARS2  |
| Severe acute respiratory syndrome coronavirus (SARS-CoV)                       | SPIKE_SARS   |
| Middle East respiratory syndrome-related coronavirus (MERS-CoV)                | SPIKE_MERS1  |
| Human coronavirus HKU1 (isolate N5) (HCoV-HKU1)                                | SPIKE_CVHN5  |
| Human coronavirus OC43 (HCoV-OC43)                                             | SPIKE_CVHOC  |
| Murine coronavirus (strain A59) (MHV-A59) (Murine hepatitis virus)             | SPIKE_CVMA5  |
| Murine coronavirus (strain 4) (MHV-4) (Murine hepatitis virus)                 | SPIKE_CVM4   |
| Murine coronavirus (strain JHM) (MHV-JHM) (Murine hepatitis virus)             | SPIKE_CVMJH  |
| Murine coronavirus (strain JHMV / variant CL-2) (MHV) (Murine hepatitis virus) | SPIKE_CVMJC  |

**Table S3.** Coronavirus' S proteins used for sequence and amino acids pattern analysis.
